# Supplementary material for: Increased Interpersonal Brain Synchronization in Romantic Couples Is Associated with Higher Honesty: An fNIRS Hyperscanning Study
Source: MDPI journal article supplement (doi:10.3390/brainsci13050833), 2023-05-21
Supplement: s1 [file s1]

## Supplementary materials

**Table S1.** The coordinates in MNI space and corresponding neuroanatomical labels for channels.

| Channel | MNI coordinate |    |    | AAL                                    |              | Brodmann             |            |
|---------|----------------|----|----|----------------------------------------|--------------|----------------------|------------|
|         | x              | y  | z  | Area                                   | Percentage   | Area                 | Percentage |
| 01      | -              | 72 | 1  | Frontopolar area<br>Orbitofrontal area | 0.65<br>0.35 | Frontal_Sup_L        | 0.45       |
|         |                |    |    |                                        |              | Frontal_Sup_Medial_L | 0.19       |
|         |                |    |    |                                        |              | Frontal_Sup_Medial_L | 0.17       |
|         |                |    |    |                                        |              | Frontal_Mid_Orb_L    | 0.15       |
| 02      | 17             | 72 | 1  | Frontopolar area<br>Orbitofrontal area | 0.66<br>0.34 | Frontal_Sup_R        | 0.43       |
|         |                |    |    |                                        |              | Frontal_Sup_Orb_R    | 0.32       |
|         |                |    |    |                                        |              | Frontal_Sup_Medial_R | 0.20       |
|         |                |    |    |                                        |              | Frontal_Mid_Orb_R    | 0.05       |
| 03      | -              | 67 | 12 | Frontopolar area                       | 0.94         | Frontal_Sup_L        | 0.81       |
|         |                |    |    | Orbitofrontal area                     | 0.04         | Frontal_Mid_L        | 0.19       |
| 04      | 5              | 70 | 14 | Frontopolar area                       | 1.00         | Frontal_Sup_Medial_R | 0.66       |
| 05      | 29             | 68 | 11 | Frontopolar area                       | 0.93         | Frontal_Sup_R        | 0.93       |
|         |                |    |    | Orbitofrontal area                     | 0.07         | Frontal_Mid_R        | 0.07       |
| 06      | -              | 66 | 26 | Frontopolar area                       | 0.93         | Frontal_Sup_L        | 0.67       |
|         |                |    |    | Dorsolateral prefrontal cortex         | 0.07         | Frontal_Sup_Medial_L | 0.33       |
| 07      | 15             | 68 | 26 | Frontopolar area                       | 0.98         | Frontal_Sup_R        | 0.51       |
|         |                |    |    | Dorsolateral prefrontal cortex         | 0.02         | Frontal_Sup_Medial_R | 0.42       |
|         |                |    |    |                                        |              | Frontal_Mid_R        | 0.07       |
| 08      | -              | 55 | 35 | Dorsolateral prefrontal cortex         | 0.49         |                      |            |
|         |                |    |    |                                        | 0.45         | Frontal_Sup_L        | 0.60       |
|         |                |    |    | Dorsolateral prefrontal cortex         | 0.05         | Frontal_Mid_L        | 0.40       |
|         |                |    |    |                                        |              |                      |            |
| 09      | 3              | 59 | 37 | Dorsolateral prefrontal cortex         | 0.65         | Frontal_Sup_Medial_L | 0.53       |
|         |                |    |    | Frontopolar area                       | 0.35         | Frontal_Sup_Medial_R | 0.47       |

|    |    |    |    |                                |      |                      |      |
|----|----|----|----|--------------------------------|------|----------------------|------|
| 10 | 28 | 56 | 34 | Dorsolateral prefrontal cortex | 0.51 |                      |      |
|    |    |    |    | Dorsolateral prefrontal cortex | 0.41 | Frontal_Mid_R        | 0.57 |
|    |    |    |    |                                | 0.08 | Frontal_Sup_R        | 0.43 |
| 11 | -  | 50 | 47 | Dorsolateral prefrontal cortex | 1.00 | Frontal_Sup_L        | 0.56 |
|    |    |    |    |                                |      | Frontal_Sup_Medial_L | 0.44 |
| 12 | 15 | 51 | 47 | Dorsolateral prefrontal cortex | 1.00 | Frontal_Sup_R        | 0.59 |
|    |    |    |    |                                |      | Frontal_Sup_Medial_R | 0.41 |
| 13 | 69 | -  | 50 | Fusiform gyrus                 | 0.42 |                      |      |
|    |    |    |    | Middle Temporal gyrus          | 0.38 | Temporal_Mid_R       | 0.93 |
|    |    |    |    | Superior Temporal Gyrus        | 0.13 | Temporal_Inf_R       | 0.07 |
| 14 | 71 | -  | 39 | Superior Temporal Gyrus        | 1.00 | Temporal_Sup_R       | 0.64 |
|    |    |    |    |                                |      | Temporal_Mid_R       | 0.36 |
| 15 | 62 | -  | 62 | Fusiform gyrus                 | 0.58 | Temporal_Mid_R       | 0.91 |
|    |    |    |    | Angular gyrus                  | 0.20 | Temporal_Sup_R       | 0.07 |
|    |    |    |    | Middle Temporal gyrus          | 0.14 | Angular_R            | 0.02 |
| 16 | 66 | -  | 50 | Superior Temporal Gyrus        | 0.62 | Temporal_Sup_R       | 0.35 |
|    |    |    |    | Supramarginal gyrus            | 0.22 | Angular_R            | 0.34 |
|    |    |    |    | Retrosubicular area            | 0.11 | SupraMarginal_R      | 0.29 |
| 17 | 68 | -  | 38 | Supramarginal gyrus part of    | 0.91 |                      |      |
|    |    |    |    | Wernicke's area                |      | SupraMarginal_R      | 0.96 |
|    |    |    |    | Primary Somatosensory Cortex   | 0.09 | Parietal_Inf_R       | 0.04 |
| 18 | 59 | -  | 60 | Angular gyrus, part of         |      |                      |      |
|    |    |    |    | Wernicke's area                | 0.83 | Angular_R            | 0.70 |
|    |    |    |    | Supramarginal gyrus part of    | 0.17 | Parietal_Inf_R       | 0.30 |
| 19 | 61 | -  | 47 | Supramarginal gyrus part of    | 0.99 |                      |      |
|    |    |    |    | Wernicke's area                |      | Parietal_Inf_R       | 0.79 |
|    |    |    |    | Angular gyrus, part of         | 0.11 | SupraMarginal_R      | 0.21 |
|    |    |    |    | Wernicke's area                |      |                      |      |

---

**Table S2.** Descriptive results of the deception trials included in the subsequent analysis for each group.

| Group | $M \pm SD$        |
|-------|-------------------|
| CMF   | 13.62 $\pm$ 8.99  |
| CFM   | 23.86 $\pm$ 9.03  |
| SMF   | 25.40 $\pm$ 14.06 |
| SFM   | 34.00 $\pm$ 8.67  |

**Table S3-1.** The results of one-sample *t*-tests(CMF group-0.086–0.192 Hz).

| Channel | <i>t</i> | <i>p</i>    | <i>p<sub>corr</sub></i> |
|---------|----------|-------------|-------------------------|
| 01      | 3.450248 | 0.002530166 | 0.048073147             |
| 02      | -0.37482 | 0.711738357 | 0.837832781             |
| 03      | 0.508193 | 0.616877567 | 0.781378252             |
| 04      | 0.250783 | 0.804540235 | 0.837832781             |
| 05      | 1.576458 | 0.130606826 | 0.354504243             |
| 06      | 1.265545 | 0.220221288 | 0.516819857             |
| 07      | 0.614147 | 0.546041772 | 0.74105669              |
| 08      | 1.048371 | 0.306972326 | 0.529631004             |
| 09      | 1.198296 | 0.244809406 | 0.516819857             |
| 10      | 0.207351 | 0.837832781 | 0.837832781             |
| 11      | 0.988946 | 0.334503792 | 0.529631004             |
| 12      | 0.761711 | 0.455121743 | 0.665177933             |
| 13      | 3.112305 | 0.00548948  | 0.052150063             |
| 14      | 1.917025 | 0.069632872 | 0.220504096             |
| 15      | 1.065041 | 0.299547174 | 0.529631004             |
| 16      | 2.09166  | 0.049434764 | 0.187852104             |
| 17      | 0.223773 | 0.825204068 | 0.837832781             |
| 18      | 2.890325 | 0.00904724  | 0.057299188             |
| 19      | 2.393307 | 0.026621151 | 0.126450468             |

**Table S3-2.** The results of one-sample *t*-tests(CFM group-0.086–0.192 Hz).

| Channel | <i>t</i>     | <i>p</i>    | <i>p<sub>corr</sub></i> |
|---------|--------------|-------------|-------------------------|
| 01      | 1.063668893  | 0.29955744  | 0.517417397             |
| 02      | 0.35091488   | 0.729148105 | 0.814930235             |
| 03      | -0.920313981 | 0.001829876 | 0.01738382              |
| 04      | 3.564777567  | 0.128128968 | 0.427307854             |
| 05      | 1.584041234  | 0.184173963 | 0.427307854             |
| 06      | 1.373205737  | 0.628817508 | 0.74672079              |
| 07      | -0.117103401 | 0.38214091  | 0.546793365             |
| 08      | 1.315849811  | 0.001171283 | 0.01738382              |
| 09      | 0.490569909  | 0.296070933 | 0.517417397             |
| 10      | 0.892686415  | 0.15099388  | 0.427307854             |
| 11      | 1.320604854  | 0.169817818 | 0.427307854             |
| 12      | 3.752862936  | 0.402900374 | 0.546793365             |
| 13      | 1.071577885  | 0.367860468 | 0.546793365             |
| 14      | 1.490373864  | 0.907890869 | 0.907890869             |
| 15      | 0.239354879  | 0.813151046 | 0.858326105             |
| 16      | 2.605925673  | 0.200845396 | 0.427307854             |
| 17      | 1.42162262   | 0.813151046 | 0.858326105             |
| 18      | 0.853707727  | 0.016500412 | 0.104502608             |
| 19      | 0.727416694  | 0.475003121 | 0.60167062              |

**Table S3-3.** The results of one-sample *t*-tests(CMF group-0.011–0.022 Hz).

| Channel | <i>t</i>     | <i>p</i>    | <i>p<sub>corr</sub></i> |
|---------|--------------|-------------|-------------------------|
| 01      | 0.131484806  | 0.8967055   | 0.8967055               |
| 02      | -1.806496382 | 0.085912191 | 0.408082909             |
| 03      | -0.381243282 | 0.205271824 | 0.464728707             |
| 04      | -1.806496382 | 0.435980878 | 0.665067639             |
| 05      | 0.794940445  | 0.14131588  | 0.447500285             |
| 06      | 0.794940445  | 0.220134651 | 0.464728707             |
| 07      | 0.178712294  | 0.334819488 | 0.57832457              |
| 08      | -0.180155922 | 0.13826294  | 0.447500285             |
| 09      | -1.265792012 | 0.596682833 | 0.809783844             |
| 10      | 0.988285094  | 0.082865476 | 0.408082909             |
| 11      | -1.085881916 | 0.022826543 | 0.216852159             |
| 12      | -1.544006519 | 0.45504628  | 0.665067639             |
| 13      | 0.537750732  | 0.707042624 | 0.895587324             |
| 14      | 1.825699732  | 0.85996155  | 0.8967055               |
| 15      | -0.218239031 | 0.858843055 | 0.8967055               |
| 16      | 1.296827747  | 0.290446661 | 0.551848656             |
| 17      | -2.466041492 | 0.829454271 | 0.8967055               |
| 18      | -0.761840013 | 0.209453151 | 0.464728707             |
| 19      | 4.77820159   | 0.000114646 | 0.002178274             |

**Table S4.** The results of independent-sample *t*-tests on the IBS significantly increased group and non-significant group.

| Channel | Significant group | Non-significant group | <i>t</i> | <i>p</i> |
|---------|-------------------|-----------------------|----------|----------|
| CH01    | CMF               | CFM                   | 2.33     | 0.025    |
|         |                   | SMF                   | 3.13     | 0.003    |
|         |                   | SFM                   | 3.02     | 0.004    |
| CH03    | CFM               | CMF                   | 0.73     | 0.470    |
|         |                   | SMF                   | 3.02     | 0.004    |
|         |                   | SFM                   | 1.49     | 0.144    |
| CH08    | CFM               | CMF                   | 0.45     | 0.656    |
|         |                   | SMF                   | 2.62     | 0.012    |
|         |                   | SFM                   | 3.52     | 0.001    |
| CH19    | CMF               | CFM                   | 3.06     | 0.004    |
|         |                   | SMF                   | 2.51     | 0.017    |
|         |                   | SFM                   | 2.68     | 0.011    |

*Note.* CMF: couple-male informer-female guesser dyads; CFM: couple-female informer-male guesser dyads; SMF: Stranger-Male informer-Female guesser dyads. SFM: Stranger-Female informer-male guesser dyads.

**Table S5.** Two-way ANOVAs on IBS at all the channels in two frequency bands.

| Freq                  | Channel | Relationship type |          |                          | Gender composition |          |                          |
|-----------------------|---------|-------------------|----------|--------------------------|--------------------|----------|--------------------------|
|                       |         | <i>F</i> value    | <i>p</i> | <i>p</i> <sub>corr</sub> | <i>F</i> value     | <i>p</i> | <i>p</i> <sub>corr</sub> |
| 0.192-<br>0.186<br>Hz | 01      | 10.07             | <0.001   | 0.01                     | 3.20               | 0.08     | 0.25                     |
|                       | 02      | 0.67              | 0.42     | 0.42                     | 1.31               | 0.26     | 0.37                     |
|                       | 03      | 2.78              | 0.10     | 0.14                     | 7.79               | 0.01     | 0.13                     |
|                       | 04      | 2.49              | 0.12     | 0.15                     | 0.28               | 0.60     | 0.67                     |
|                       | 05      | 7.96              | 0.01     | 0.02                     | 3.17               | 0.08     | 0.25                     |
|                       | 06      | 4.91              | 0.03     | 0.05                     | 2.20               | 0.14     | 0.30                     |
|                       | 07      | 8.43              | <0.001   | 0.02                     | 4.77               | 0.03     | 0.20                     |
|                       | 08      | 2.81              | 0.10     | 0.14                     | 0.11               | 0.75     | 0.75                     |
|                       | 09      | 7.17              | 0.01     | 0.02                     | 5.81               | 0.02     | 0.17                     |
|                       | 10      | 5.36              | 0.02     | 0.04                     | 2.24               | 0.14     | 0.30                     |
|                       | 11      | 5.87              | 0.02     | 0.04                     | 3.26               | 0.07     | 0.25                     |
|                       | 12      | 9.48              | <0.001   | 0.01                     | 0.53               | 0.47     | 0.55                     |
|                       | 13      | 2.32              | 0.13     | 0.16                     | 1.59               | 0.21     | 0.35                     |
|                       | 14      | 5.60              | 0.02     | 0.04                     | 0.81               | 0.37     | 0.48                     |
|                       | 15      | 1.47              | 0.23     | 0.24                     | 2.21               | 0.14     | 0.30                     |
|                       | 16      | 11.04             | <0.001   | 0.01                     | 1.51               | 0.22     | 0.35                     |
|                       | 17      | 11.12             | <0.001   | 0.01                     | 0.78               | 0.38     | 0.48                     |
|                       | 18      | 8.96              | <0.001   | 0.01                     | 1.71               | 0.19     | 0.35                     |
|                       | 19      | 1.93              | 0.17     | 0.19                     | 0.13               | 0.72     | 0.75                     |
| 0.022-<br>0.011<br>Hz | 01      | 1.26              | 0.26     | 0.28                     | 0.19               | 0.67     | 0.89                     |
|                       | 02      | 7.50              | 0.01     | 0.02                     | 0.41               | 0.52     | 0.89                     |
|                       | 03      | 2.68              | 0.11     | 0.13                     | 0.63               | 0.43     | 0.89                     |
|                       | 04      | 0.60              | 0.44     | 0.44                     | 0.21               | 0.65     | 0.89                     |
|                       | 05      | 21.89             | <0.001   | < 0.001                  | 0.10               | 0.75     | 0.89                     |
|                       | 06      | 7.01              | 0.01     | 0.03                     | 0.54               | 0.47     | 0.89                     |
|                       | 07      | 23.14             | <0.001   | < 0.001                  | 2.20               | 0.14     | 0.89                     |
|                       | 08      | 2.45              | 0.12     | 0.14                     | 0.26               | 0.61     | 0.89                     |
|                       | 09      | 6.02              | 0.02     | 0.04                     | 0.04               | 0.84     | 0.89                     |
|                       | 10      | 3.38              | 0.07     | 0.10                     | 0.62               | 0.43     | 0.89                     |
|                       | 11      | 3.89              | 0.05     | 0.08                     | 0.06               | 0.80     | 0.89                     |
|                       | 12      | 9.42              | <0.001   | 0.01                     | 1.68               | 0.20     | 0.89                     |
|                       | 13      | 3.20              | 0.08     | 0.10                     | 0.01               | 0.93     | 0.93                     |
|                       | 14      | 12.65             | <0.001   | < 0.001                  | 0.93               | 0.34     | 0.89                     |
|                       | 15      | 4.74              | 0.03     | 0.06                     | 0.73               | 0.40     | 0.89                     |
|                       | 16      | 2.19              | 0.14     | 0.16                     | 0.37               | 0.55     | 0.89                     |
|                       | 17      | 4.98              | 0.03     | 0.06                     | 3.56               | 0.06     | 0.89                     |
|                       | 18      | 8.87              | <0.001   | 0.01                     | 0.09               | 0.76     | 0.89                     |
|                       | 19      | 4.55              | 0.04     | 0.06                     | 2.59               | 0.11     | 0.89                     |

**Table S6.** The results of one-sample  $t$ -tests on Granger Causality of two directions in all significant channels.

| Channel | Informer-Guesser |        | Guesser-informer |        |
|---------|------------------|--------|------------------|--------|
|         | $t$              | $p$    | $t$              | $p$    |
| CH01    | 5.48             | <0.001 | 7.25             | <0.001 |
| CH03    | 27.03            | <0.001 | 22.38            | <0.001 |
| CH08    | 8.28             | <0.001 | 8.84             | <0.001 |
| CH19    | 20.11            | <0.001 | 17.85            | <0.001 |
